# Supplementary material
Source: publisher figshare collection journal article supplement (https://gsapubs.figshare.com/articles/dataset/_/12534749)
Supplement: Supplementary file 1 [file 1]

GSA Data Repository item 2017090

Controls and feedbacks in the coupling of mountain channels and hillslopes

Antonius Golly, Jens M. Turowski, Alexandre Badoux, and Niels Hovius

doi:10.1130/G38831.1

See also 2017090\_Movie\_DR1.wmv.

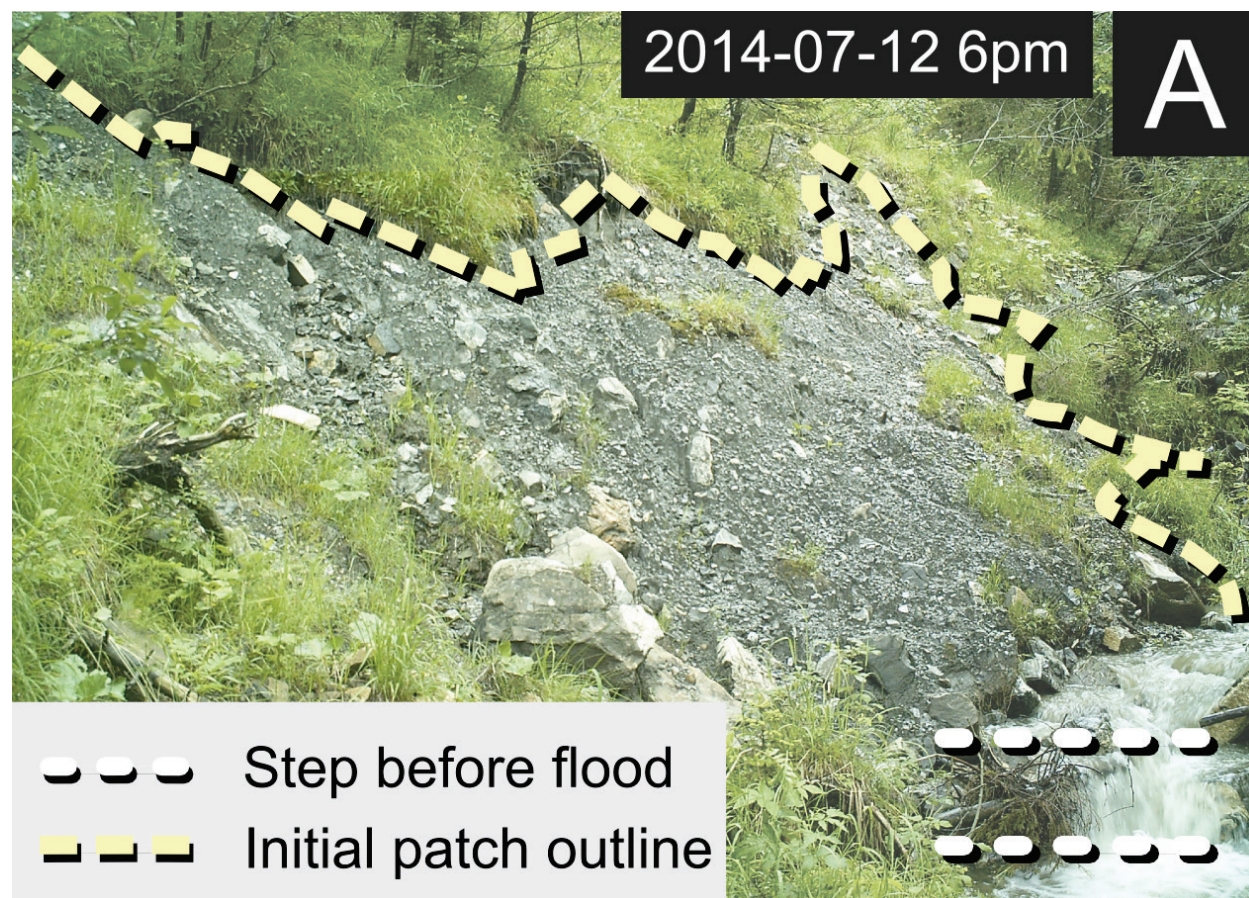

Figure DR1.

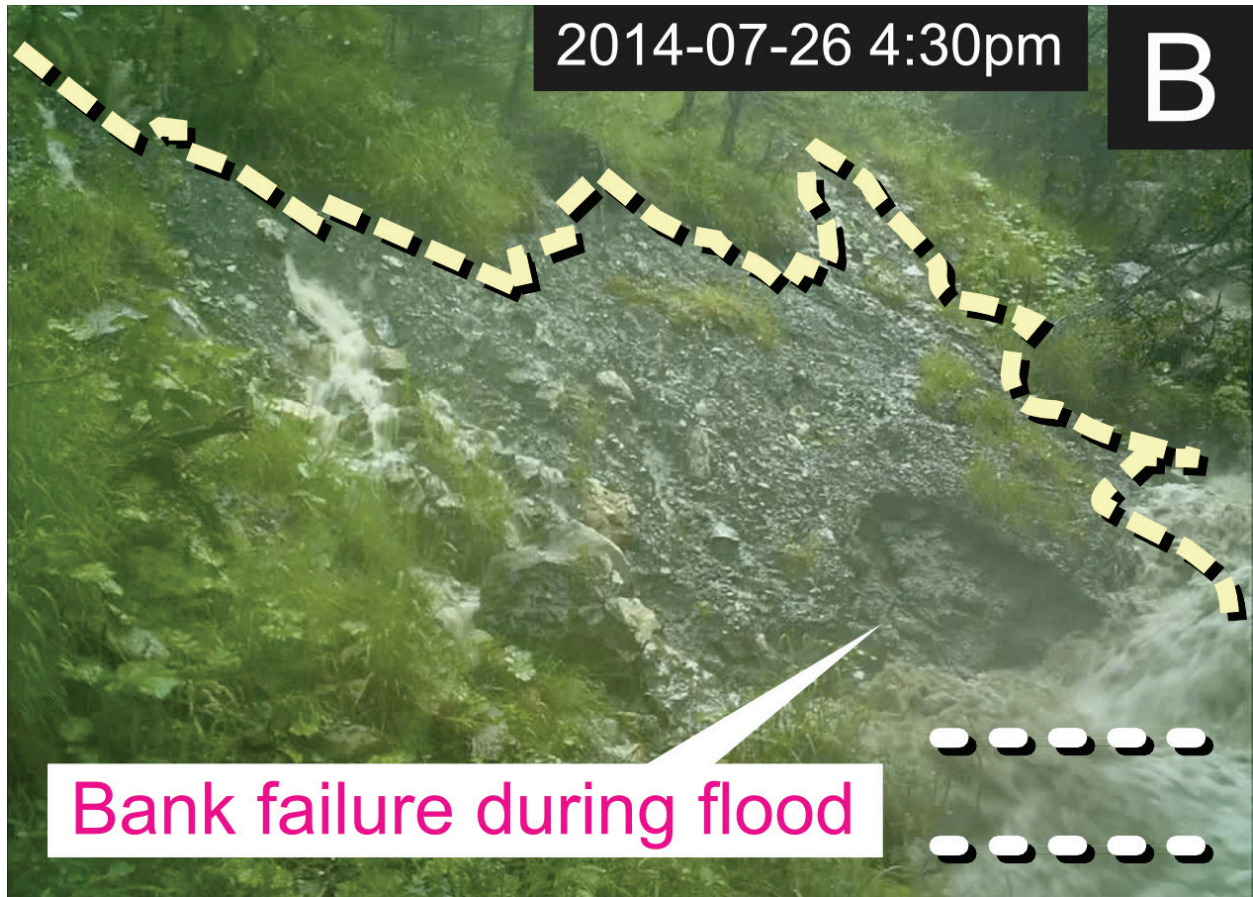

Figure DR2.



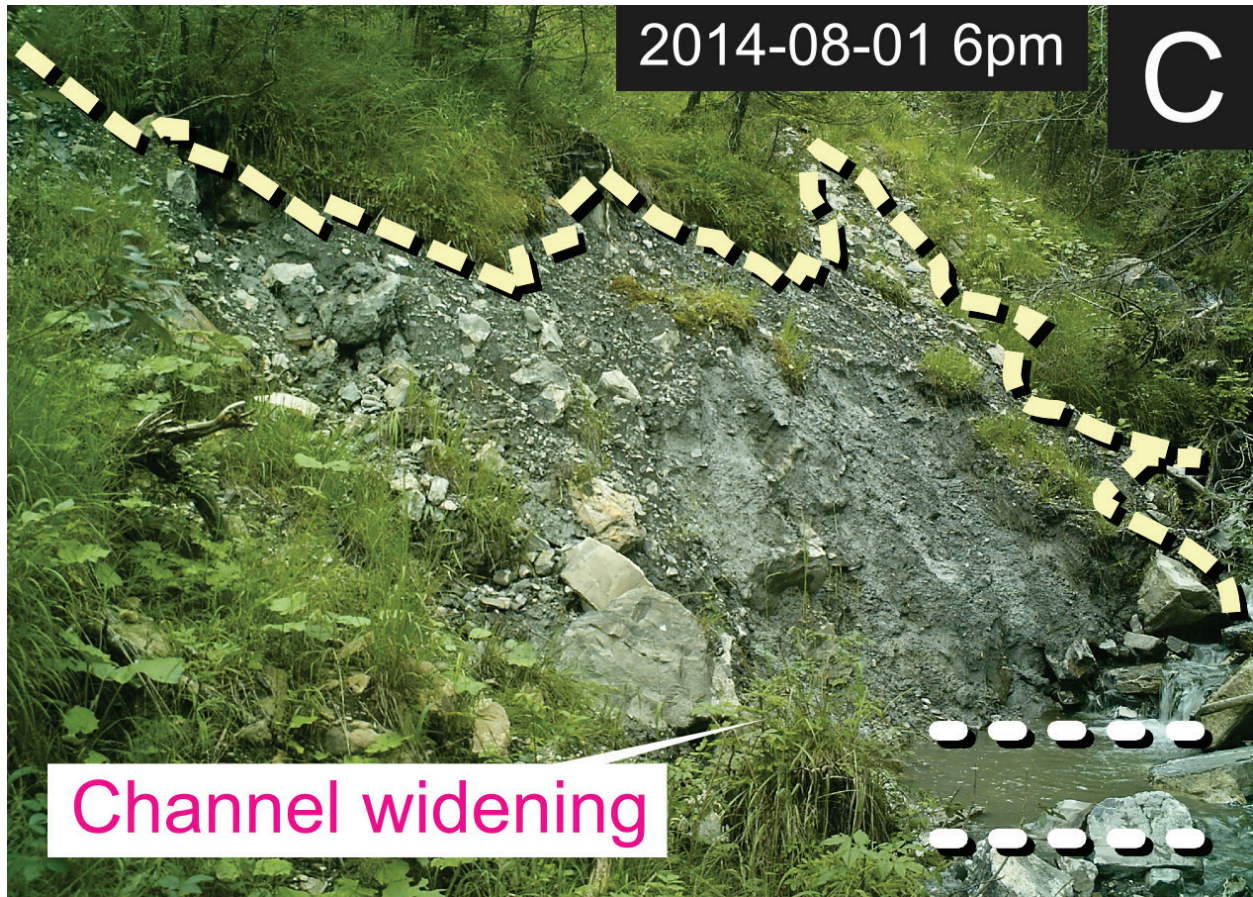

Figure DR3.



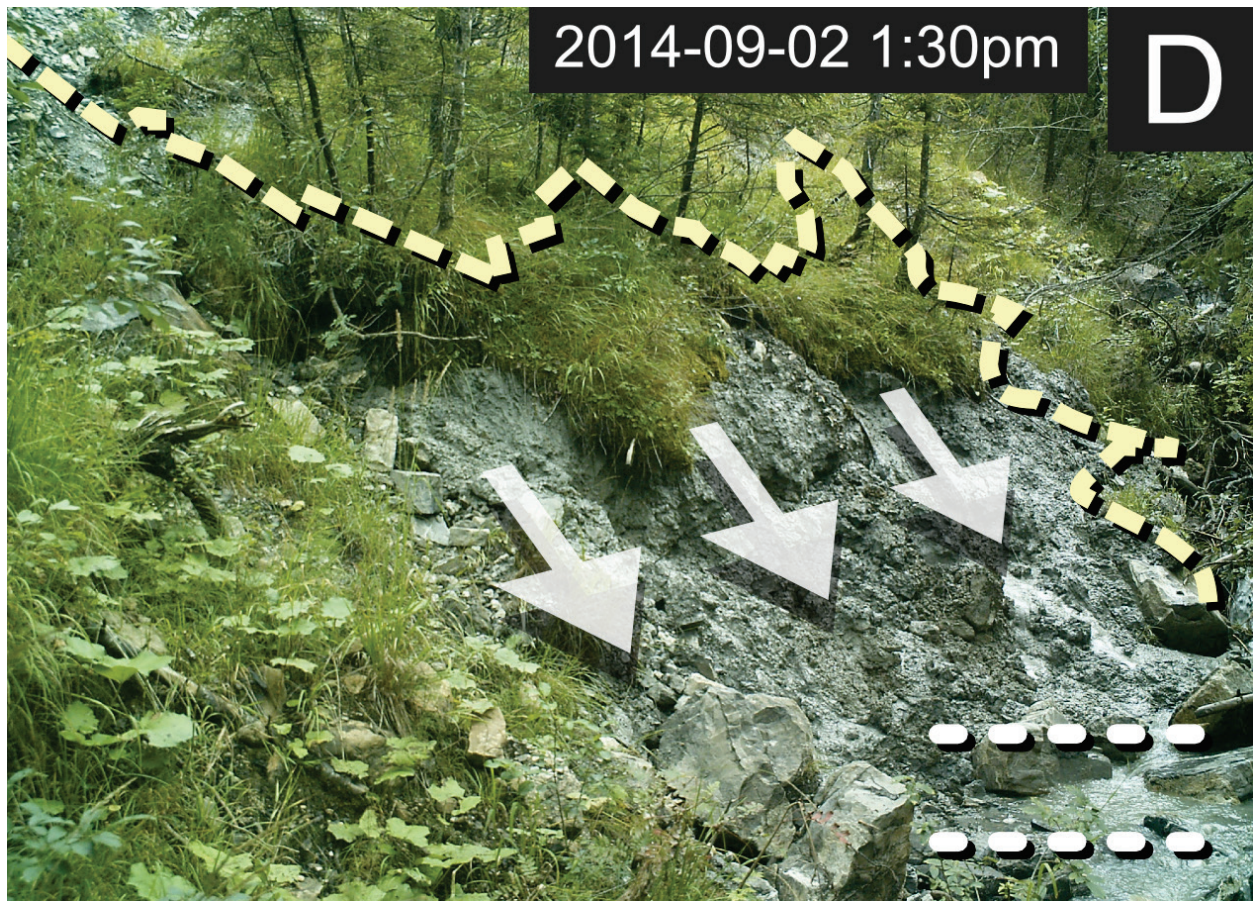

Figure DR4.



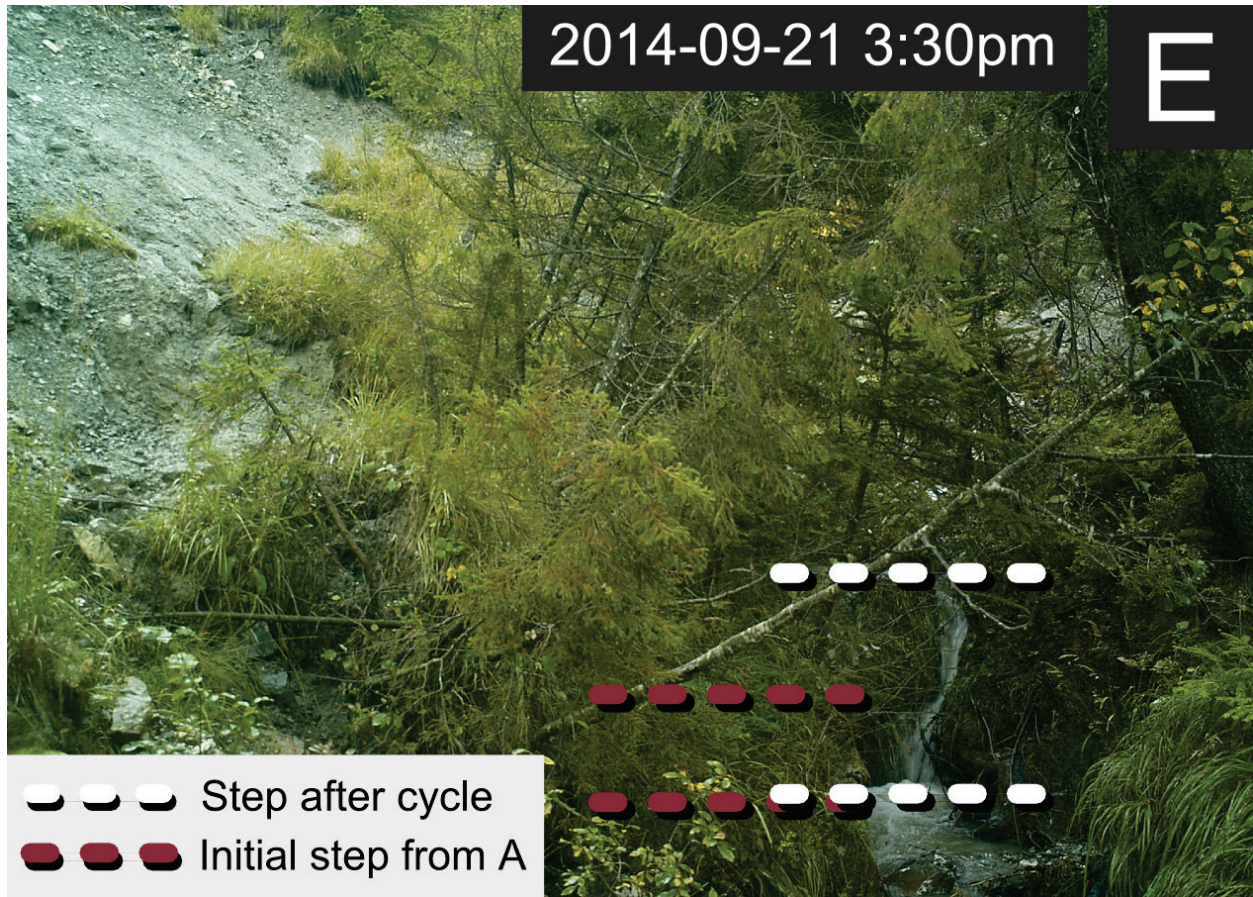

Figure DR5.
